# Supplementary material for: Palm Fruit Bioactives modulate human astrocyte activity in vitro altering the cytokine secretome reducing levels of TNFα, RANTES and IP-10
Source: PubMed Central journal article supplement (PMC6219577; doi:10.1038/s41598-018-34763-3), 2018-11-06
Supplement: 41598_2018_34763_MOESM1_ESM.pdf [file 41598_2018_34763_MOESM1_ESM.pdf]

## **Additional Figures and Tables**

### **Palm Fruit Bioactives modulate human astrocyte activity *in vitro* altering the cytokine secretome reducing levels of TNF $\alpha$ , RANTES and IP-10**

Robert P. Weinberg<sup>†1,2\*</sup>, Vera V. Koledova<sup>†1,2</sup>, Kirsten Schneider<sup>1,2</sup>, TG Sambandan<sup>1,2</sup>, Adlai Grayson<sup>1,2</sup>, Gal Zeidman<sup>1,2</sup>, Anastasia Artamonova<sup>1,2</sup>, Ravigadevi Sambanthamurthi<sup>3</sup>, Syed Fairus<sup>3</sup>, Anthony J. Sinskey<sup>1,2</sup>, ChoKyun Rha<sup>2\*</sup>

† Authors RPW and VVK contributed equally to this paper

Addresses: <sup>1</sup>Department of Biology, Massachusetts Institute of Technology, Cambridge, MA 02139, USA; <sup>2</sup>Biomaterials Science and Engineering Laboratory, Massachusetts Institute of Technology, Cambridge, MA 02139, USA; <sup>3</sup>Advanced Biotechnology and Breeding Centre, Malaysian Palm Oil Board, 6, Persiaran Institusi, Bandar Baru Bangi, 43000 Kajang, Selangor, Malaysia

Emails: Robert P. Weinberg\* - [rweinber@mit.edu](mailto:rweinber@mit.edu); Vera V. Koledova - [koledova@mit.edu](mailto:koledova@mit.edu); Kirsten Schneider - [kirstens@mit.edu](mailto:kirstens@mit.edu); TG Sambandan - [gnana@mit.edu](mailto:gnana@mit.edu); Adlai Grayson - [adlai.grayson@bison.howard.edu](mailto:adlai.grayson@bison.howard.edu); Gal Zeidman - [gzeidman@mit.edu](mailto:gzeidman@mit.edu); Anastasia Artamonova - [artana@mit.edu](mailto:artana@mit.edu); Ravigadevi Sambanthamurthi - [ravigadevi@gmail.com](mailto:ravigadevi@gmail.com); Syed Fairus - [syfairus@mpob.gov.my](mailto:syfairus@mpob.gov.my); Anthony Sinskey - [asinskey@mit.edu](mailto:asinskey@mit.edu); ChoKyun Rha\* - [ckrha@mit.edu](mailto:ckrha@mit.edu)

\*Corresponding authors: Robert Weinberg – [rweinber@mit.edu](mailto:rweinber@mit.edu)  
ChoKyun Rha – [ckrha@mit.edu](mailto:ckrha@mit.edu)

Proof and Reprint Requests should be addressed to:

Robert P. Weinberg  
Department of Biology  
Biomaterials Science and Engineering Laboratory  
Massachusetts Institute of Technology  
77 Massachusetts Avenue, Room 56-265A  
Cambridge, Massachusetts 02139 U.S.A.  
(Telephone) +1-617-253-3493  
(Facsimile) +1-617-253-6358  
(Email) [rweinber@mit.edu](mailto:rweinber@mit.edu)

## Captions to Supplementary Figures and Tables

### Additional Figure 1.

File format: .docx

Title: Additional Figure 1. GFAP expression by normal human astrocytes (NHA) shown by immunohistochemistry.

Description: GFAP-positive astrocytes have intensely brown cytoplasmic stain, nuclei are counterstained with haematoxylin (blue). Positive GFAP staining was ~80 percent. Primary GFAP-antibodies obtained from Santa-Cruz Biotechnology.

### Additional Table 1.

File format: .docx.

Title: Additional Table 1. Absolute values for cytokine/chemokine secretion by human astrocytes with stimulation by IL-1 $\beta$  at 24 and 96 hours.

Description: For each cytokine, values are given as average concentration +/- standard deviation for the IL-1 $\beta$ -stimulated condition. ND indicates not detected, outside the limits of quantitation. n/A for standard deviation indicates only one measurement was within the range of quantitation. Experiment performed in triplicate.

### Additional Table 2.

File format: .docx

Title: Additional Table 2. Absolute values for cytokine/chemokine secretion by unstimulated human astrocytes at 24 hours exposed to PFB.

Description: For each cytokine, values are given as average concentration +/- standard deviation. ND indicates not detected. n/A for standard deviation indicates only one measurement was within the range of quantitation. Experiment performed in triplicate.

### Additional Table 3.

File format: .docx

Title: Additional Table 3. Absolute values for cytokine/chemokine secretion by unstimulated human astrocytes at 96 hours exposed to PFB.

Description: For each cytokine, values are given as average concentration +/- standard deviation. ND indicates not detected. n/A for standard deviation indicates only one measurement was within the range of quantitation. Experiment performed in triplicate.

#### Additional Table 4.

File format: .docx

Title: Additional Table 4. Palm Fruit Bioactives significantly decreased secretion of cytokines RANTES, TNF $\alpha$ , and IP-10, inflammatory markers induced by IL-1 $\beta$  in human astrocytes in the present study.

Description: IL-1 $\beta$  stimulation and Palm Fruit Bioactives treatment were performed simultaneously, with media harvest occurring at 24 and 96 hours. The experiment was performed three times on subsequent passages of NHA in duplicate for each passage (experiment N1, N2, and N3). Means of individual experiments are listed with the measurement standard deviation; despite large inter-experimental variation of means, PFB decreased expression of these inflammatory markers in a dose-dependent manner in all experiments. ND indicates below the level of quantitation, n/A for standard deviation indicates only one measurement was within the range of quantitation.

#### Additional Figure 2.

File format: .docx

Title: Additional Figure 1. Different fraction of PFB as shown by chromatograms of HPLC.

Description: A) Phenolics fraction of PFB contains five marker compounds, protocatechuic acid, 4-hydroxybenzoic acid, and three caffeoylshikimic acid isomers, among others; B) non-phenolics fraction of PFB does not possess phenolic acid marker compounds and does possess soluble fibers, intercalated shikimic acid, and other relatively polar compounds. Fractionation performed by ethyl acetate and water liquid-liquid extraction.

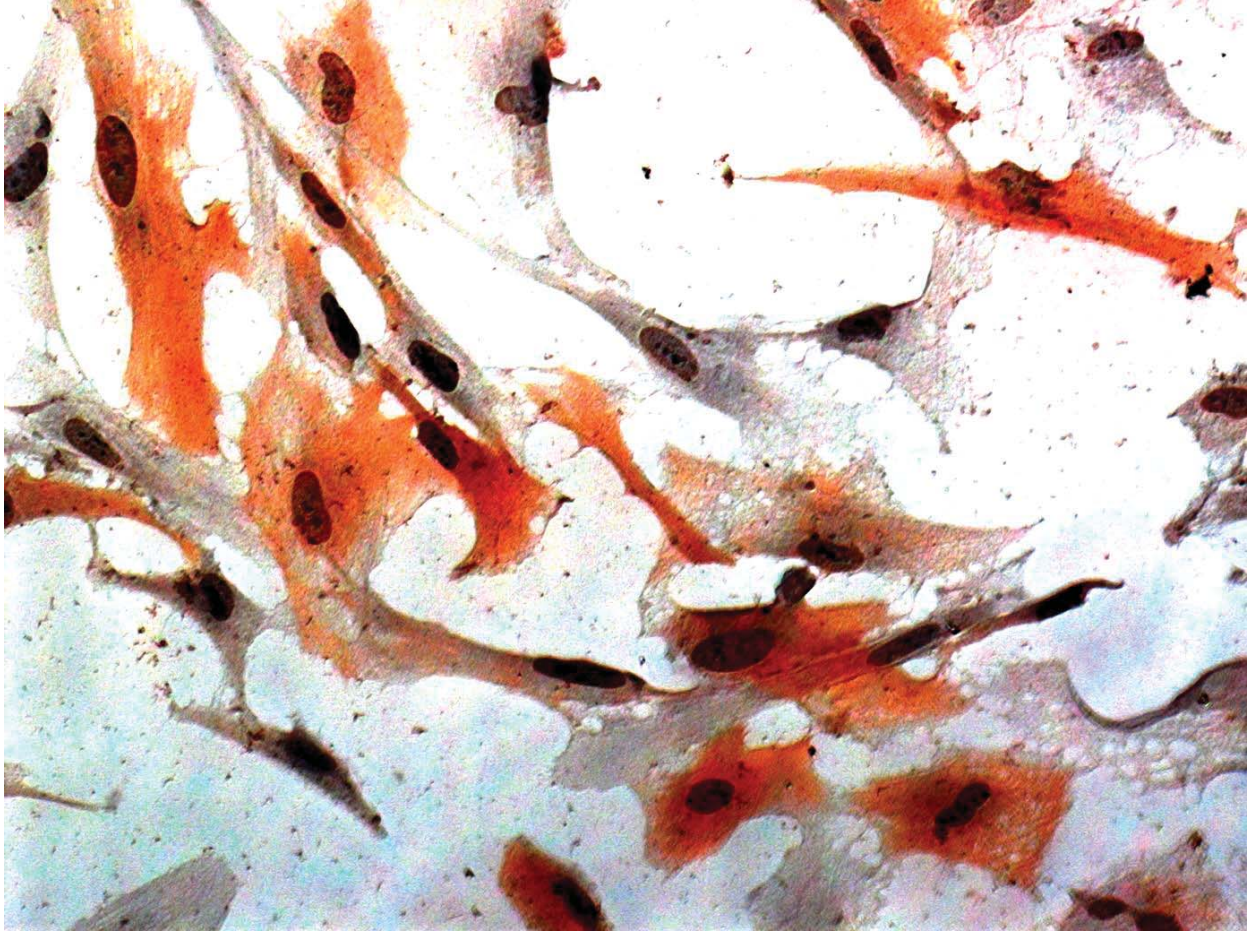

Additional Figure 1.

File format: .docx

Title: Additional Figure 1. Normal Human Astrocytes (NHA), immunohistochemistry staining for GFAP (brown color), haematoxylin counterstain for nuclei (blue).

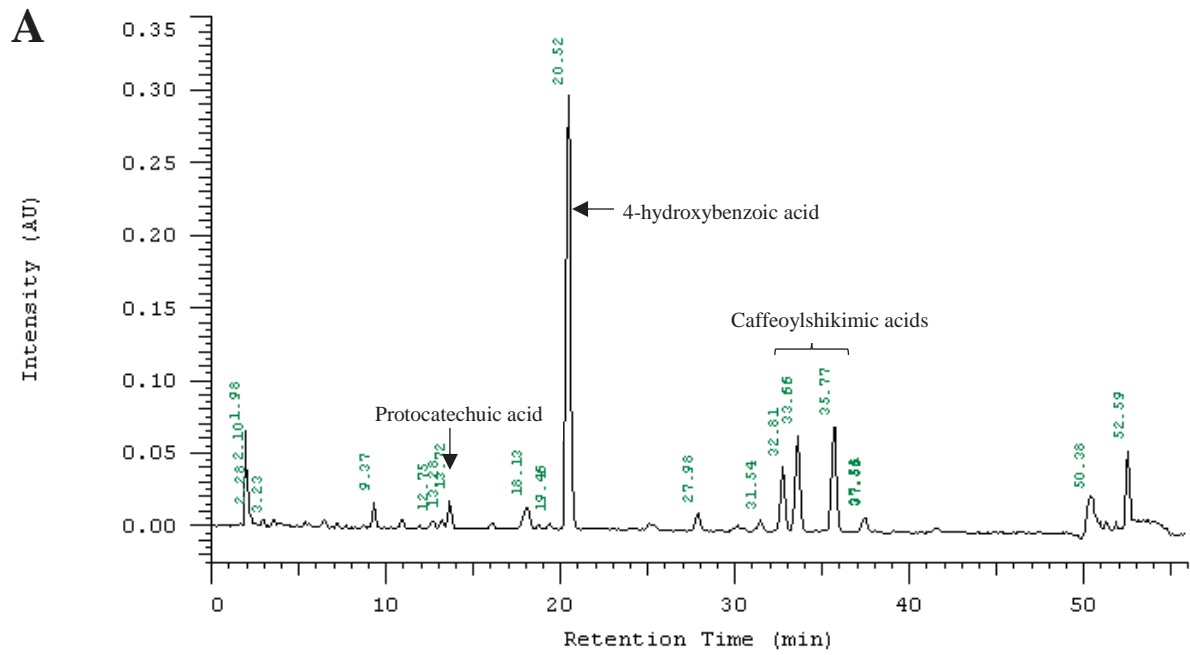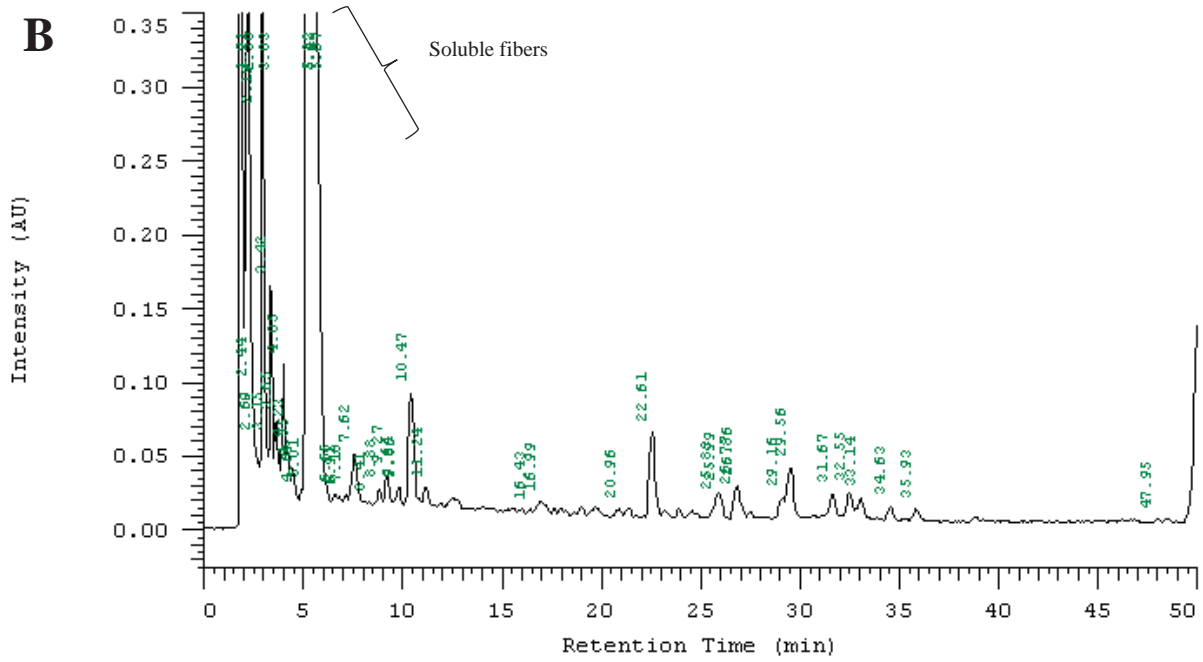

Additional Figure 2

**Additional Table 1. Absolute values for cytokine/chemokine secretion by human astrocytes with stimulation by IL-1 $\beta$  at 24 and 96 hours.**

| Protein        | Gene location that encodes protein       | 24 h protein concentration<br>Avg $\pm$ 1 STD<br>(pg/mL) | 96 h protein concentration<br>Avg $\pm$ 1 STD<br>(pg/mL) |
|----------------|------------------------------------------|----------------------------------------------------------|----------------------------------------------------------|
| Eotaxin        | 17q12                                    | 33.1 $\pm$ 6.7                                           | 48.1 $\pm$ 19.0                                          |
| FGF-2          | 4q28.1                                   | 57.5 $\pm$ 20.3                                          | 76.7 $\pm$ 33.4                                          |
| Flt3L          | 19q13.33                                 | ND                                                       | ND                                                       |
| Fractalkine    | 16q21                                    | 136.6 $\pm$ 29.4                                         | 205.8 $\pm$ 31.7                                         |
| G-CSF          | 17q21.1                                  | 5906.5 $\pm$ 3503.5                                      | 10993.5 $\pm$ 6473.6                                     |
| GM-CSF         | 5q31.1                                   | 2587.2 $\pm$ 1309.7                                      | 6902.3 $\pm$ 2359.7                                      |
| GRO            | 4q13.3                                   | 15553.0 $\pm$ n/A                                        | 14730.0 $\pm$ n/A                                        |
| IFN $\alpha$ 2 | 9p21.3                                   | 42.1 $\pm$ 18.2                                          | 55.1 $\pm$ 11.4                                          |
| IFN $\gamma$   | 12q15                                    | 10.6 $\pm$ 1.4                                           | 7.6 $\pm$ 5.6                                            |
| IL-10          | 1q32.1                                   | ND                                                       | ND                                                       |
| IL-12(p40)     | 5q33.3                                   | 10.3 $\pm$ 2.7                                           | 11.9 $\pm$ 6.9                                           |
| IL-12(p70)     | 3Q25.33 & 5q33.3                         | 10.4 $\pm$ 5.2                                           | 9.0 $\pm$ 4.2                                            |
| IL-13          | 5q31.1                                   | 5.4 $\pm$ 0.8                                            | 7.1 $\pm$ 3.0                                            |
| IL-15          | 4q31.21                                  | 3.9 $\pm$ 0.7                                            | 11.5 $\pm$ 5.2                                           |
| IL-17A         | 6p12.2                                   | 4.5 $\pm$ 2.1                                            | 5.1 $\pm$ 1.9                                            |
| IL-1 $\alpha$  | 2q14.1                                   | 7.3 $\pm$ 1.6                                            | 29.7 $\pm$ 10.4                                          |
| IL-1RA         | 2q14.1                                   | 215.2 $\pm$ 341.7                                        | 14.5 $\pm$ 14.5                                          |
| IL-2           | 4q27                                     | ND                                                       | ND                                                       |
| IL-3           | 5q31.1                                   | ND                                                       | ND                                                       |
| IL-4           | 5q31.1                                   | 15.6 $\pm$ 2.0                                           | 21.9 $\pm$ 8.1                                           |
| IL-5           | 5q31.1                                   | ND                                                       | ND                                                       |
| IL-6           | 7p15.3                                   | 13416.3 $\pm$ 4595.6                                     | 15942.0 $\pm$ 2545.6                                     |
| IL-7           | 8q21.13                                  | 24.8 $\pm$ 17.9                                          | 32.6 $\pm$ 7.7                                           |
| IL-8           | 4q13.3                                   | 14453.0 $\pm$ 145.7                                      | 11357.5 $\pm$ 7139.7                                     |
| IL-9           | 5q31.1                                   | ND                                                       | ND                                                       |
| IP-10          | 4q21.1                                   | 561.9 $\pm$ 313.7                                        | 2749.9 $\pm$ 1255.7                                      |
| MCP-1          | 17q12                                    | ND                                                       | ND                                                       |
| MCP-3          | 17q12                                    | 62.5 $\pm$ 71.6                                          | 530.3 $\pm$ 89.7                                         |
| MDC            | 16q21                                    | 6.4 $\pm$ 1.1                                            | 6.3 $\pm$ 2.4                                            |
| MIP-1 $\alpha$ | 17q12                                    | 134.9 $\pm$ 198.8                                        | 500.4 $\pm$ 737.5                                        |
| MIP-1 $\beta$  | 17q12                                    | 88.3 $\pm$ 75.7                                          | 94.2 $\pm$ 29.7                                          |
| PDGF-AA        | 7p22.3                                   | 131.0 $\pm$ 125.9                                        | 2668.7 $\pm$ 2456.1                                      |
| PDGF-AB/BB     | 7p22.3 & 22q13.1 or<br>22q13.1 & 22q13.1 | 24.4 $\pm$ 18.8                                          | 223.5 $\pm$ 138.2                                        |
| RANTES         | 17q12                                    | 1565.6 $\pm$ 1403.3                                      | 5063.2 $\pm$ 2129.5                                      |
| sCD40L         | Xq26.3                                   | 9.1 $\pm$ 4.5                                            | 12.3 $\pm$ 3.7                                           |
| TGF $\alpha$   | 2p13.3                                   | 53.7 $\pm$ 59.2                                          | 122.6 $\pm$ 22.7                                         |
| TNF $\alpha$   | 6p21.33                                  | 706.2 $\pm$ 1114.5                                       | 183.9 $\pm$ 20.3                                         |
| TNF $\beta$    | 6p21.33                                  | 4.5 $\pm$ 1.8                                            | 4.7 $\pm$ 2.2                                            |
| VEGF           | 6p21.1                                   | 84.2 $\pm$ 12.7                                          | 976.3 $\pm$ n/A                                          |

ND indicates not detected, outside the limits of quantitation. n/A for standard deviation indicates only one measurement was within the range of quantitation. Experiment performed in triplicate.

**Additional Table 2. Absolute values for cytokine/chemokine secretion by unstimulated human astrocytes at 24 hours exposed to PFB.**

| Cytokine/chemokine profile for unstimulated NHA at 24 h exposed to PFB |                                       |                                                     |                                                                    |                                                                    |                                                                    |
|------------------------------------------------------------------------|---------------------------------------|-----------------------------------------------------|--------------------------------------------------------------------|--------------------------------------------------------------------|--------------------------------------------------------------------|
| Protein                                                                | Gene location that encodes protein    | Untreated Protein concentration<br>Avg ± SD (pg/mL) | PFB 10 µL/mL exposure<br>Protein concentration<br>Avg ± SD (pg/mL) | PFB 20 µL/mL exposure<br>Protein concentration<br>Avg ± SD (pg/mL) | PFB 40 µL/mL exposure<br>Protein concentration<br>Avg ± SD (pg/mL) |
| Eotaxin                                                                | 17q12                                 | 4.5 ± 0.0                                           | 8.3 ± 5.3                                                          | 4.6 ± 0.1                                                          | 6.6 ± 0.8                                                          |
| FGF-2                                                                  | 4q28.1                                | < 40.5                                              | 25.1 ± n/A                                                         | 21.7 ± n/A                                                         | 23.4 ±                                                             |
| Flt3L                                                                  | 19q13.33                              | ND                                                  | ND                                                                 | ND                                                                 | ND                                                                 |
| Fractalkine                                                            | 16q21                                 | 54.1 ± 17.2                                         | 66.1 ± 14.9                                                        | 34.7 ± 22.7                                                        | 52.4 ± 1.7                                                         |
| G-CSF                                                                  | 17q21.1                               | 10.4 ± 7.7                                          | 11.8 ± 7.1                                                         | 7.6 ± 4.8                                                          | 10.6 ± 0.8                                                         |
| GM-CSF                                                                 | 5q31.1                                | 4.5 ± 1.8                                           | 4.9 ± 1.5                                                          | 3.5 ± 0.9                                                          | 3.6 ± 0.5                                                          |
| GRO                                                                    | 4q13.3                                | 78.8 ± 40.9                                         | 88.7 ± 51.7                                                        | 83.2 ± 49.0                                                        | 78.6 ± 58.4                                                        |
| IFNα2                                                                  | 9p21.3                                | 9.1 ± 2.7                                           | 13.0 ± 5.4                                                         | 5.8 ± n/A                                                          | 7.0 ± 1.3                                                          |
| IFNγ                                                                   | 12q15                                 | 4.4 ± 2.2                                           | 5.4 ± 2.8                                                          | 1.4 ± n/A                                                          | 3.7 ± n/A                                                          |
| IL-10                                                                  | 1q32.1                                | ND                                                  | ND                                                                 | ND                                                                 | ND                                                                 |
| IL-12(p40)                                                             | 5q33.3                                | 6.2 ± 3.6                                           | 9.9 ± 4.7                                                          | 3.3 ± 0.1                                                          | 6.4 ± 0.8                                                          |
| IL-12(p70)                                                             | 3Q25.33 & 5q33.3                      | < 3.2                                               | 3.6 ± 0.0                                                          | 2.9 ± n/A                                                          | 1.9 ± n/A                                                          |
| IL-13                                                                  | 5q31.1                                | 2.3 ± 1.6                                           | 1.5 ± n/A                                                          | 1.2 ± n/A                                                          | 1.2 ± n/A                                                          |
| IL-15                                                                  | 4q31.21                               | 2.2 ± 1.1                                           | 2.2 ± 0.6                                                          | 1.3 ± 1.7                                                          | 2.4 ± 1.4                                                          |
| IL-17A                                                                 | 6p12.2                                | ND                                                  | 2.5 ± 1.2                                                          | 0.3 ± n/A                                                          | 0.9 ± n/A                                                          |
| IL-1α                                                                  | 2q14.1                                | < 2.7                                               | 3.0 ± 1.0                                                          | 1.3 ± n/A                                                          | 2.2 ± n/A                                                          |
| IL-1RA                                                                 | 2q14.1                                | ND                                                  | 324.8 ± 454.8                                                      | ND                                                                 | 353.1 ± 494.1                                                      |
| IL-2                                                                   | 4q27                                  | ND                                                  | ND                                                                 | ND                                                                 | ND                                                                 |
| IL-3                                                                   | 5q31.1                                | ND                                                  | ND                                                                 | ND                                                                 | ND                                                                 |
| IL-4                                                                   | 5q31.1                                | ND                                                  | 2.6 ± n/A                                                          | 3.9 ± 2.1                                                          | 4.6 ± n/A                                                          |
| IL-5                                                                   | 5q31.1                                | ND                                                  | ND                                                                 | ND                                                                 | ND                                                                 |
| IL-6                                                                   | 7p15.3                                | 579.2 ± 312.4                                       | 848.8 ± 261.3                                                      | 979.6 ± 182.5                                                      | 1001.2 ± 307.3                                                     |
| IL-7                                                                   | 8q21.13                               | < 3.2                                               | 6.2 ± 4.0                                                          | ND                                                                 | ND                                                                 |
| IL-8                                                                   | 4q13.3                                | 147.6 ± 72.6                                        | 192.9 ± 149.4                                                      | 150.8 ± 105.4                                                      | 144.6 ± 83.4                                                       |
| IL-9                                                                   | 5q31.1                                | ND                                                  | ND                                                                 | ND                                                                 | ND                                                                 |
| IP-10                                                                  | 4q21.1                                | 28.0 ± 17.0                                         | 29.0 ± 34.5                                                        | 2.9 ± n/A                                                          | 22.4 ± 27.2                                                        |
| MCP-1                                                                  | 17q12                                 | ND                                                  | ND                                                                 | ND                                                                 | ND                                                                 |
| MCP-3                                                                  | 17q12                                 | 20.1 ± 2.2                                          | 14.4 ± n/A                                                         | 13.6 ± 5.1                                                         | 13.8 ± 0.7                                                         |
| MDC                                                                    | 16q21                                 | 4.8 ± 2.5                                           | 4.9 ± 1.0                                                          | 4.0 ± 1.3                                                          | 3.8 ± 0.6                                                          |
| MIP-1α                                                                 | 17q12                                 | 27.1 ± 0.5                                          | 15.4 ± 7.5                                                         | 19.7 ± n/A                                                         | ND                                                                 |
| MIP-1β                                                                 | 17q12                                 | 3.9 ± n/A                                           | 3.4 ± 0.9                                                          | 1.9 ± n/A                                                          | 2.8 ± 0.1                                                          |
| PDGF-AA                                                                | 7p22.3                                | 155.5 ± 7.5                                         | 133.6 ± 67.6                                                       | 114.2 ± 63.2                                                       | 104.5 ± 36.1                                                       |
| PDGF-AB/BB                                                             | 7p22.3 & 22q13.1 or 22q13.1 & 22q13.1 | < 22.0                                              | 20.3 ± 22.8                                                        | 12.5 ± 12.5                                                        | 8.7 ± 8.4                                                          |
| RANTES                                                                 | 17q12                                 | 4.0 ± n/A                                           | 4.7 ± 1.7                                                          | 6.3 ± n/A                                                          | 5.5 ± n/A                                                          |
| sCD40L                                                                 | Xq26.3                                | 8.2 ± 3.3                                           | 9.7 ± 2.9                                                          | 7.3 ± 0.0                                                          | 9.6 ± 2.2                                                          |
| TGFα                                                                   | 2p13.3                                | 40.4 ± 30.3                                         | 38.9 ± 19.6                                                        | 35.1 ± 21.0                                                        | 35.9 ± 15.8                                                        |
| TNFα                                                                   | 6p21.33                               | 3.2 ± 0.0                                           | 2.2 ± 1.2                                                          | 1.5 ± 1.6                                                          | 1.9 ± 1.6                                                          |
| TNFβ                                                                   | 6p21.33                               | ND                                                  | 2.0 ± 0.9                                                          | 1.7 ± 1.4                                                          | 1.3 ± n/A                                                          |
| VEGF                                                                   | 6p21.1                                | ND                                                  | 11.1 ± n/A                                                         | ND                                                                 | 13.7 ± n/A                                                         |



ND indicates not detected. n/A for standard deviation indicates only one measurement was within the range of quantitation. Experiment performed in triplicate.

**Additional Table 3. Absolute values for cytokine/chemokine secretion by unstimulated human astrocytes at 96 hours exposed to PFB.**

| Cytokine/chemokine profile for unstimulated NHA at 96 h exposed to PFB |                                    |                                               |                                               |                                               |                                               |
|------------------------------------------------------------------------|------------------------------------|-----------------------------------------------|-----------------------------------------------|-----------------------------------------------|-----------------------------------------------|
| Protein                                                                | Gene location that encodes protein | Untreated                                     | PFB 10 $\mu$ L/mL exposure                    | PFB 20 $\mu$ L/mL exposure                    | PFB 40 $\mu$ L/mL exposure                    |
|                                                                        |                                    | Protein concentration<br>Avg $\pm$ SD (pg/mL) | Protein concentration<br>Avg $\pm$ SD (pg/mL) | Protein concentration<br>Avg $\pm$ SD (pg/mL) | Protein concentration<br>Avg $\pm$ SD (pg/mL) |
| Eotaxin                                                                | 17q12                              | 31.1 $\pm$ 28.8                               | 32.7 $\pm$ 13.4                               | 15.2 $\pm$ 3.7                                | 6.2 $\pm$ 1.7                                 |
| FGF-2                                                                  | 4q28.1                             | 68.6 $\pm$ 26.5                               | 40.6 $\pm$ 3.9                                | 39.2 $\pm$ 17.4                               | 34.1 $\pm$ n/A                                |
| Flt3L                                                                  | 19q13.33                           | ND                                            | ND                                            | ND                                            | ND                                            |
| Fractalkine                                                            | 16q21                              | 101.1 $\pm$ 49.1                              | 94.2 $\pm$ 25.0                               | 64.3 $\pm$ 22.1                               | 52.0 $\pm$ 23.3                               |
| G-CSF                                                                  | 17q21.1                            | 463.1 $\pm$ 561.2                             | 37.5 $\pm$ 11.2                               | 21.4 $\pm$ 8.2                                | 43.5 $\pm$ 11.9                               |
| GM-CSF                                                                 | 5q31.1                             | 253.1 $\pm$ 376.1                             | 16.2 $\pm$ 13.1                               | 12.6 $\pm$ 3.3                                | 9.6 $\pm$ 3.6                                 |
| GRO                                                                    | 4q13.3                             | 699.6 $\pm$ 486.3                             | 593.7 $\pm$ 297.1                             | 428.3 $\pm$ 57.9                              | 279.9 $\pm$ 138.2                             |
| IFN $\alpha$ 2                                                         | 9p21.3                             | 23.3 $\pm$ 9.4                                | 24.5 $\pm$ 2.7                                | 15.7 $\pm$ 7.1                                | 12.1 $\pm$ 1.5                                |
| IFN $\gamma$                                                           | 12q15                              | 5.7 $\pm$ 2.0                                 | 4.8 $\pm$ 0.6                                 | 5.5 $\pm$ 3.7                                 | 4.3 $\pm$ 1.3                                 |
| IL-10                                                                  | 1q32.1                             | ND                                            | ND                                            | ND                                            | ND                                            |
| IL-12(p40)                                                             | 5q33.3                             | 8.8 $\pm$ 3.1                                 | 7.6 $\pm$ 1.1                                 | 6.6 $\pm$ 3.8                                 | 5.5 $\pm$ 1.9                                 |
| IL-12(p70)                                                             | 3Q25.33 & 5q33.3                   | 6.4 $\pm$ 0.3                                 | 7.0 $\pm$ 3.0                                 | 4.9 $\pm$ 2.4                                 | 3.7 $\pm$ 0.3                                 |
| IL-13                                                                  | 5q31.1                             | 2.3 $\pm$ n/A                                 | 1.8 $\pm$ n/A                                 | 2.5 $\pm$ 0.8                                 | 1.5 $\pm$ n/A                                 |
| IL-15                                                                  | 4q31.21                            | 5.8 $\pm$ 4.9                                 | 5.4 $\pm$ 1.9                                 | 3.9 $\pm$ 1.9                                 | 3.8 $\pm$ 1.7                                 |
| IL-17A                                                                 | 6p12.2                             | 3.3 $\pm$ 0.3                                 | 2.5 $\pm$ 1.7                                 | 2.5 $\pm$ 1.5                                 | 2.8 $\pm$ 0.8                                 |
| IL-1 $\alpha$                                                          | 2q14.1                             | 8.2 $\pm$ 1.3                                 | 2.7 $\pm$ 0.6                                 | 4.4 $\pm$ 2.7                                 | 5.4 $\pm$ 1.8                                 |
| IL-1RA                                                                 | 2q14.1                             | 18.2 $\pm$ n/A                                | 2923.2 $\pm$ 4127.8                           | 2066.2 $\pm$ 2917.3                           | 878.3 $\pm$ 1236.9                            |
| IL-2                                                                   | 4q27                               | ND                                            | ND                                            | ND                                            | ND                                            |
| IL-3                                                                   | 5q31.1                             | ND                                            | ND                                            | ND                                            | ND                                            |
| IL-4                                                                   | 5q31.1                             | 18.9 $\pm$ n/A                                | 2.9 $\pm$ 1.1                                 | ND                                            | ND                                            |
| IL-5                                                                   | 5q31.1                             | ND                                            | ND                                            | ND                                            | ND                                            |
| IL-6                                                                   | 7p15.3                             | 3980.1 $\pm$ 3442.9                           | 5384.6 $\pm$ 3356.6                           | 4961.3 $\pm$ 2604.1                           | 2000.3 $\pm$ 273.1                            |
| IL-7                                                                   | 8q21.13                            | 29.5 $\pm$ 3.5                                | 12.1 $\pm$ 3.6                                | 6.6 $\pm$ 2.5                                 | 3.4 $\pm$ 1.5                                 |
| IL-8                                                                   | 4q13.3                             | 1581.5 $\pm$ 1289.7                           | 2233.6 $\pm$ 1407.0                           | 1279.7 $\pm$ 543.5                            | 717.6 $\pm$ 92.2                              |
| IL-9                                                                   | 5q31.1                             | ND                                            | ND                                            | ND                                            | ND                                            |
| IP-10                                                                  | 4q21.1                             | 34.0 $\pm$ 20.7                               | 15.9 $\pm$ 15.8                               | 21.0 $\pm$ 21.3                               | 30.5 $\pm$ 38.6                               |
| MCP-1                                                                  | 17q12                              | ND                                            | 8262.0 $\pm$ n/A                              | ND                                            | ND                                            |
| MCP-3                                                                  | 17q12                              | 82.6 $\pm$ 79.7                               | 50.3 $\pm$ 34.5                               | 28.0 $\pm$ 5.8                                | 14.2 $\pm$ 4.3                                |
| MDC                                                                    | 16q21                              | 5.4 $\pm$ 1.6                                 | 8.0 $\pm$ 3.9                                 | 5.7 $\pm$ 2.2                                 | 5.6 $\pm$ 2.5                                 |
| MIP-1 $\alpha$                                                         | 17q12                              | 24.4 $\pm$ 5.0                                | 21.5 $\pm$ 14.3                               | 16.6 $\pm$ 8.4                                | 19.2 $\pm$ 13.3                               |
| MIP-1 $\beta$                                                          | 17q12                              | 18.2 $\pm$ 8.8                                | 11.7 $\pm$ 1.6                                | 6.1 $\pm$ 3.1                                 | 3.5 $\pm$ 1.4                                 |
| PDGF-AA                                                                | 7p22.3                             | 2183.2 $\pm$ 2002.0                           | 1289.2 $\pm$ 824.5                            | 994.4 $\pm$ 567.5                             | 401.1 $\pm$ 135.2                             |
|                                                                        | 7p22.3 & 22q13.1 or 22q13.1 &      |                                               |                                               |                                               |                                               |
| PDGF-AB/BB                                                             | 22q13.1                            | 157.7 $\pm$ 110.0                             | 45.9 $\pm$ 21.0                               | 19.9 $\pm$ 20.8                               | 13.3 $\pm$ 10.1                               |
| RANTES                                                                 | 17q12                              | 22.2 $\pm$ 12.6                               | 4.1 $\pm$ 1.4                                 | 5.6 $\pm$ 2.3                                 | 6.2 $\pm$ 5.4                                 |
| sCD40L                                                                 | Xq26.3                             | 5.9 $\pm$ 2.6                                 | 7.5 $\pm$ 3.2                                 | 8.6 $\pm$ 0.1                                 | 8.8 $\pm$ 1.9                                 |
| TGF $\alpha$                                                           | 2p13.3                             | 63.6 $\pm$ 43.1                               | 82.7 $\pm$ 37.5                               | 128.1 $\pm$ 36.4                              | 138.9 $\pm$ 38.3                              |
| TNF $\alpha$                                                           | 6p21.33                            | 18.0 $\pm$ 17.5                               | 1.9 $\pm$ 2.0                                 | 3.5 $\pm$ 1.3                                 | 2.1 $\pm$ 2.1                                 |
| TNF $\beta$                                                            | 6p21.33                            | 3.2 $\pm$ 0.8                                 | 2.6 $\pm$ n/A                                 | 2.4 $\pm$ n/A                                 | 1.1 $\pm$ n/A                                 |
| VEGF                                                                   | 6p21.1                             | ND                                            | 124.5 $\pm$ n/A                               | 12.0 $\pm$ n/A                                | 161.3 $\pm$ n/A                               |

ND indicates not detected. n/A for standard deviation indicates only one measurement was within the range of quantitation. Experiment performed in triplicate.

**Additional Table 4. Palm Fruit Bioactives significantly decreased secretion of cytokines RANTES, TNF $\alpha$ , and IP-10, inflammatory markers induced by IL-1 $\beta$  in human astrocytes in the present study.**

| 24 hour experiment – IL-1 $\beta$ stimulated |            |                                             |                                              |                                              |                                              |
|----------------------------------------------|------------|---------------------------------------------|----------------------------------------------|----------------------------------------------|----------------------------------------------|
| Analyte                                      | Experiment | PFB 0 $\mu$ L/mL<br>Avg $\pm$ SD<br>(pg/mL) | PFB 10 $\mu$ L/mL<br>Avg $\pm$ SD<br>(pg/mL) | PFB 20 $\mu$ L/mL<br>Avg $\pm$ SD<br>(pg/mL) | PFB 40 $\mu$ L/mL<br>Avg $\pm$ SD<br>(pg/mL) |
| RANTES                                       | N1         | 407.3 $\pm$ 12.4                            | 305 $\pm$ 26.1                               | 114.8 $\pm$ 7.1                              | 38.1 $\pm$ 6.6                               |
|                                              | N2         | 2943.5 $\pm$ 358.5                          | 1927.5 $\pm$ 277.9                           | 1399.5 $\pm$ 88.4                            | 1064.4 $\pm$ 99.6                            |
|                                              | N3         | 580.0 $\pm$ 24.7                            | 673.2 $\pm$ 70.7                             | 214.4 $\pm$ 8.7                              | 12.0 $\pm$ n/A                               |
| TNF $\alpha$                                 | N1         | 91.2 $\pm$ 3.5                              | 62.1 $\pm$ 3.0                               | 46.6 $\pm$ 2.1                               | 26.0 $\pm$ 2.7                               |
|                                              | N2         | 222.0 $\pm$ 16.5                            | 72.1 $\pm$ 14.1                              | 50.6 $\pm$ 2.6                               | 34.8 $\pm$ 1.7                               |
|                                              | N3         | 136 $\pm$ 0.5                               | 140.1 $\pm$ 16.9                             | 104.3 $\pm$ 12                               | 20.3 $\pm$ 3.4                               |
| IP-10                                        | N1         | 885.2 $\pm$ 46.6                            | 303.1 $\pm$ 31.2                             | 96.5 $\pm$ 3.1                               | 22.6 $\pm$ 5.1                               |
|                                              | N2         | 757.1 $\pm$ 62.0                            | 250.8 $\pm$ 20.1                             | 116.7 $\pm$ 20.5                             | ND                                           |
|                                              | N3         | 396.4 $\pm$ 3.6                             | 236.4 $\pm$ 15.8                             | 114.5 $\pm$ 14.8                             | ND                                           |
| 96 hour experiment – IL-1 $\beta$ stimulated |            |                                             |                                              |                                              |                                              |
| Analyte                                      | Experiment | PFB 0 $\mu$ L/mL<br>Avg $\pm$ SD<br>(pg/mL) | PFB 10 $\mu$ L/mL<br>Avg $\pm$ SD<br>(pg/mL) | PFB 20 $\mu$ L/mL<br>Avg $\pm$ SD<br>(pg/mL) | PFB 40 $\mu$ L/mL<br>Avg $\pm$ SD<br>(pg/mL) |
| RANTES                                       | N1         | 3900.5 $\pm$ 273.7                          | 903.3 $\pm$ 37.5                             | 204.1 $\pm$ 0.5                              | 5 $\pm$ n/A                                  |
|                                              | N2         | 8465 $\pm$ 633.6                            | 5854.5 $\pm$ 229.8                           | 3629.5 $\pm$ 285.0                           | 1326 $\pm$ 66.5                              |
|                                              | N3         | 2844.5 $\pm$ 468.8                          | 801.6 $\pm$ 157.2                            | 458.5 $\pm$ 74.3                             | ND                                           |
| TNF $\alpha$                                 | N1         | 200.6 $\pm$ 11.2                            | 95.0 $\pm$ 0.7                               | 44.3 $\pm$ 1.7                               | 2.4 $\pm$ 0.4                                |
|                                              | N2         | 190.0 $\pm$ 4.1                             | 76.7 $\pm$ 0.5                               | 51.7 $\pm$ 5.8                               | 27.0 $\pm$ 0.3                               |
|                                              | N3         | 161.4 $\pm$ 24.3                            | 70.9 $\pm$ 12.1                              | 90.7 $\pm$ 7.1                               | 4.8 $\pm$ 2.4                                |
| IP-10                                        | N1         | 3459 $\pm$ 355.0                            | 1064.5 $\pm$ 6.4                             | 323.9 $\pm$ 17.6                             | 11.8 $\pm$ 1.8                               |
|                                              | N2         | 961.0 $\pm$ 84.8                            | 385.8 $\pm$ 0.8                              | 146.3 $\pm$ 8.2                              | ND                                           |
|                                              | N3         | 2826 $\pm$ 538.8                            | 855.8 $\pm$ 91.0                             | 298.1 $\pm$ 56.3                             | 50.7 $\pm$ 3.4                               |

IL-1 $\beta$  stimulation and Palm Fruit Bioactives treatment were performed simultaneously, with media harvest occurring at 24 and 96 hours. The experiment was performed three times on subsequent passages of NHA in duplicate for each passage (experiment N1, N2, and N3). Means of individual experiments are listed with the measurement standard deviation; despite large inter-experimental variation of means, PFB decreased expression of these inflammatory markers in a dose-dependent manner in all experiments. ND indicates below the level of quantitation, n/A for standard deviation indicates only one measurement was within the range of quantitation.
